# Supplementary material
Source: PubMed Central journal article supplement (PMC2688533)
Supplement: emboj2009114s15.pdf [file emboj2009114s15.pdf]

Figure S3

**A**

|                |     |                    |                |         |                  |           |         |     |
|----------------|-----|--------------------|----------------|---------|------------------|-----------|---------|-----|
| BubR1_H.sap.   | 386 | QQA                | SEEKKEKMMYCKEK | IYAGVG- | EFS--            | FEEIRA--- | EVFRKKL | 424 |
| Bub1_H.sap.    | 225 | LASKVDVEQVVMYCKEK  | LIRGES-        | EFS--   | FEE LRA---       | QKYNQRR   | 263     |     |
| Bub1_S.cerev.  | 315 | KPERIVFNFNLIYPENDE | -----          | EFN--   | TEEILAMIKGLYKVQR | 351       |         |     |
| Mad3_S.cerev.  | 354 | KPEKIDCNFKLIYCDEE  | SKGGRL         | EFS--   | LEEVLALSRNVYKRV  | 396       |         |     |
| Nup98_H.sap.   | 178 | VSTNISTKHQCITAMKEY | -----          | E-SKSL  | EE LRL---        | EDYQANR   | 212     |     |
| c13orf3_H.sap. | 345 | SSPTISSYENLLRTPTPP | -----          | EVTKIP  | EDILQLL-SKYN SNL | 382       |         |     |

SecStrucPred 

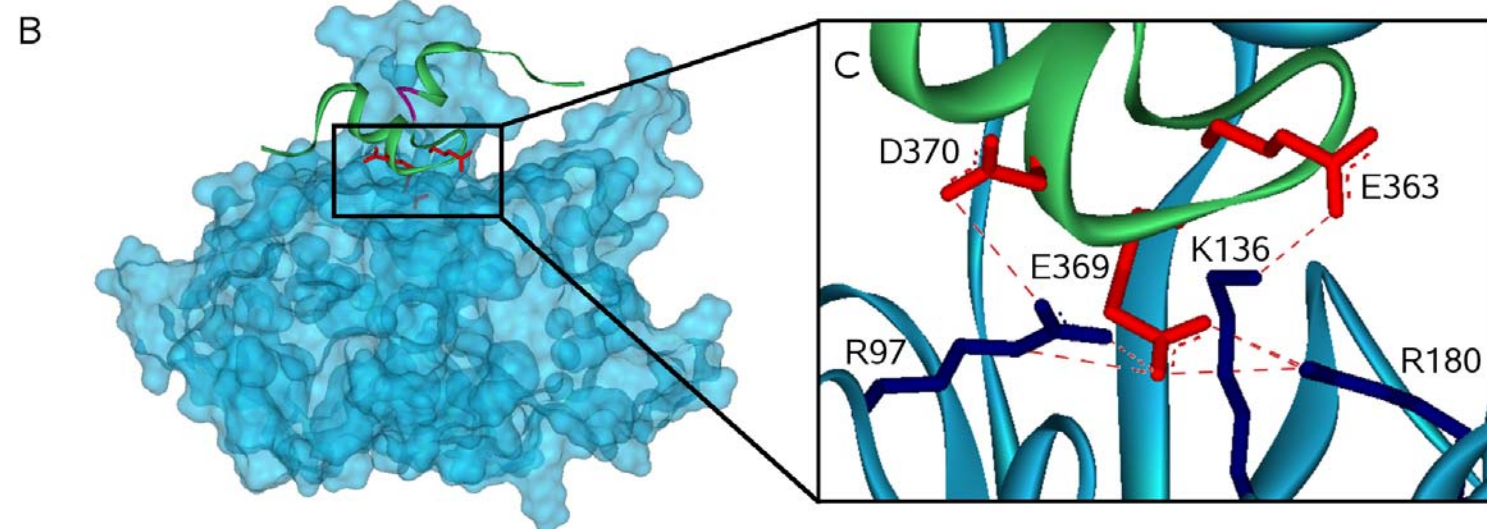

# Figure S6

## A

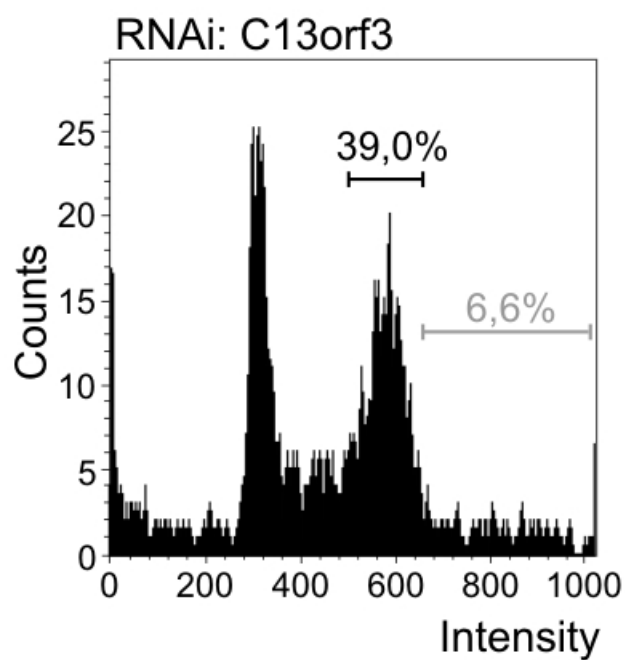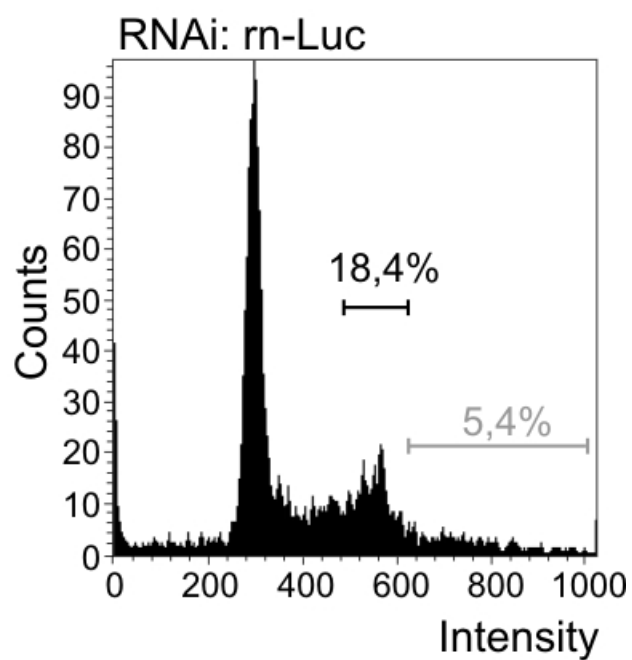

## B

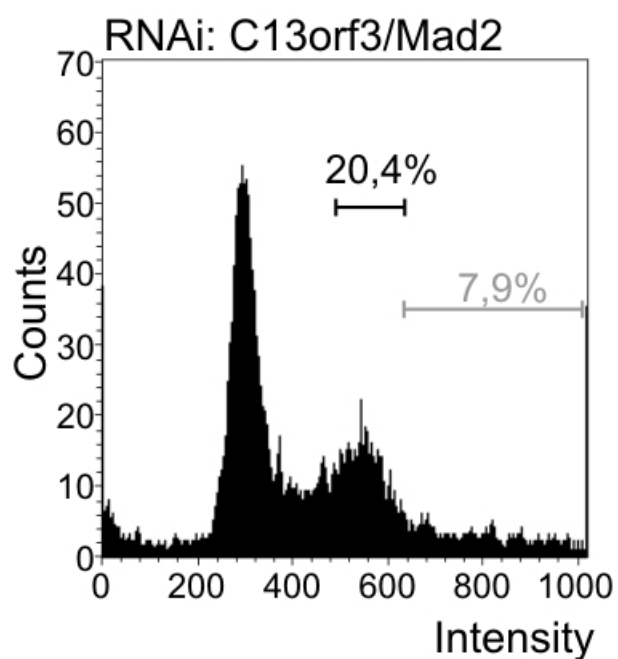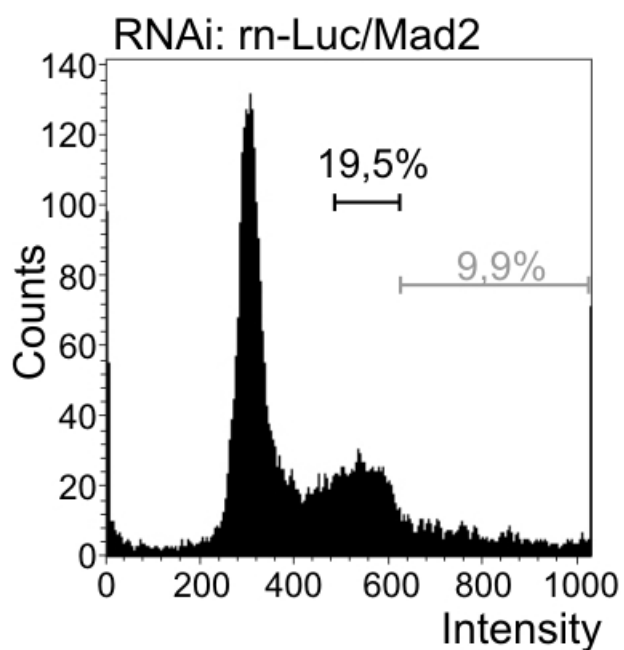

# Figure S7

## A

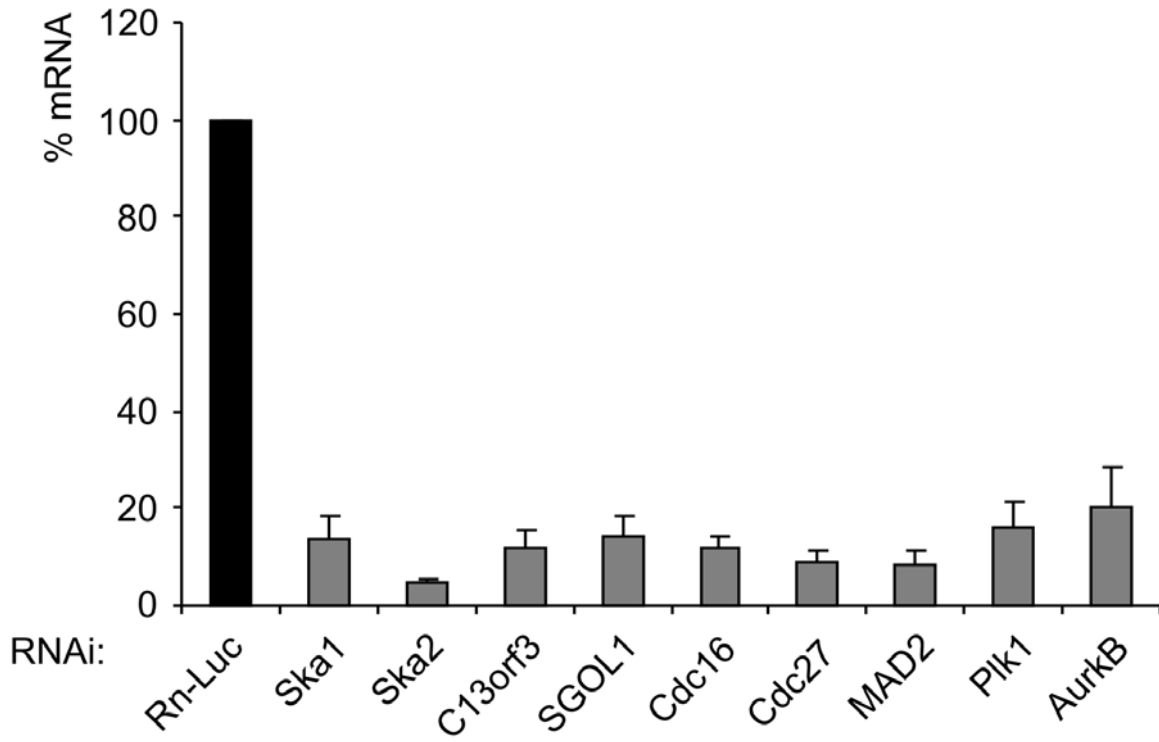

## B

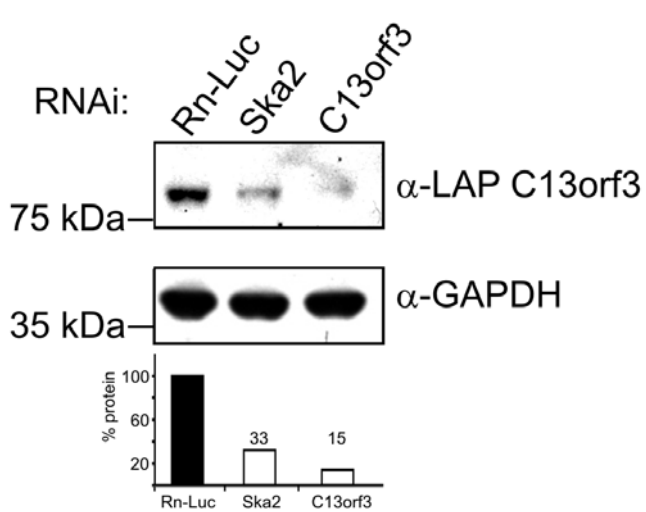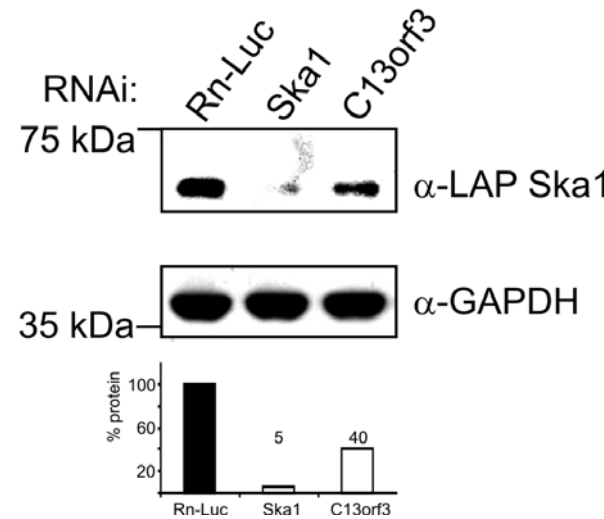

## **Supplementary information S8**

### **Q-PCR primer sequences:**

#### **Ska1 – C18orf24 (ENSG00000154839):**

LEFT PRIMER CGAAGGATACCAAAGGTCGT  
RIGHT PRIMER CTCCGGCAGTGTCGTAAAAT

#### **Ska2 – Fam33a (ENSG00000182628):**

LEFT PRIMER AGAGCCGCATTTGTGCTACT  
RIGHT PRIMER TGCCGCAGTTTTCTCTTCT

#### **C13orf3 (ENSG00000165480):**

LEFT PRIMER TCCTGGTTTGAAAATTCCATCT  
RIGHT PRIMER TCGTAGGTGAAGAGGGATCTG

#### **SGOL1 (ENSG00000129810):**

LEFT PRIMER TCTGGAATGGACCCCAATAG  
RIGHT PRIMER TCTCCTTGTCCTGGAAGTTCA

#### **MAD2 (ENSG00000164109):**

LEFT PRIMER CTTCTCATTTCGGCATCAACA  
RIGHT PRIMER GAGTCCGATTTCTGCACTCG

#### **Cdc16 (ENSG00000130177):**

LEFT PRIMER AGGGACGCTTGTAGAGCTGA  
RIGHT PRIMER ATCCCACTGCAAACCAAGAC

#### **Cdc27 (ENSG00000004897):**

LEFT PRIMER GCAAATTTACAGAGCCTCA  
RIGHT PRIMER ACGAGGGATTCTTTGGGAAC

#### **Plk1 (ENSG00000166851) :**

LEFT PRIMER CATCCTGCACCTCAGCAAC  
RIGHT PRIMER CATCAGTGGGCACAAGATGA

#### **AurkB (ENSG00000178999):**

LEFT PRIMER GGGAGAGCTGAAGATTGCTG  
RIGHT PRIMER GCACCACAGATCCACCTTCT

Figure S12

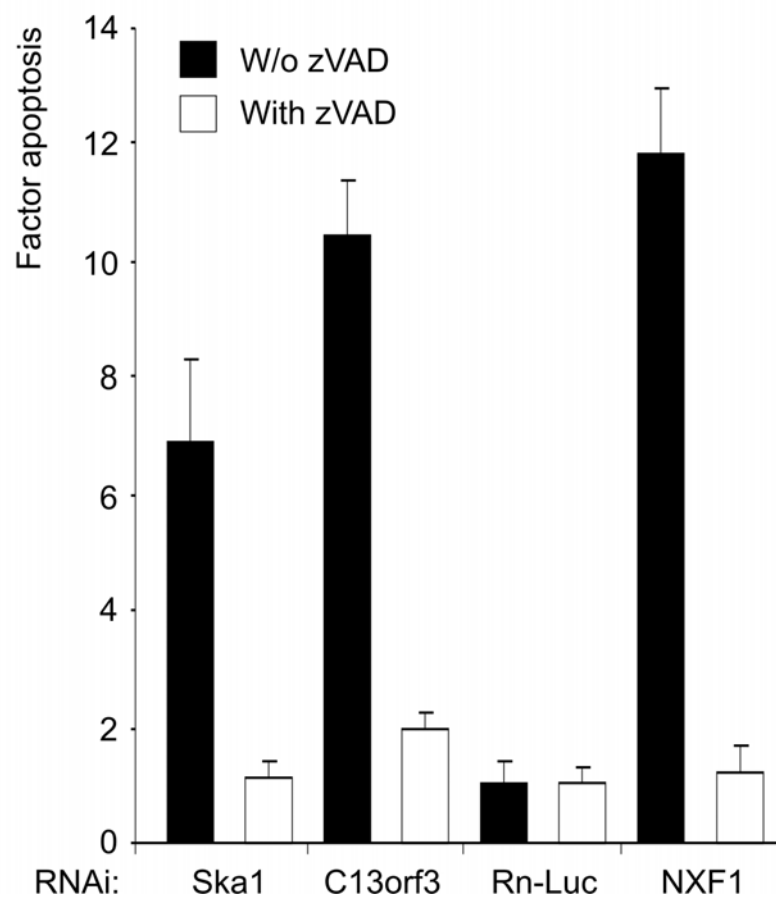

Figure S13

A

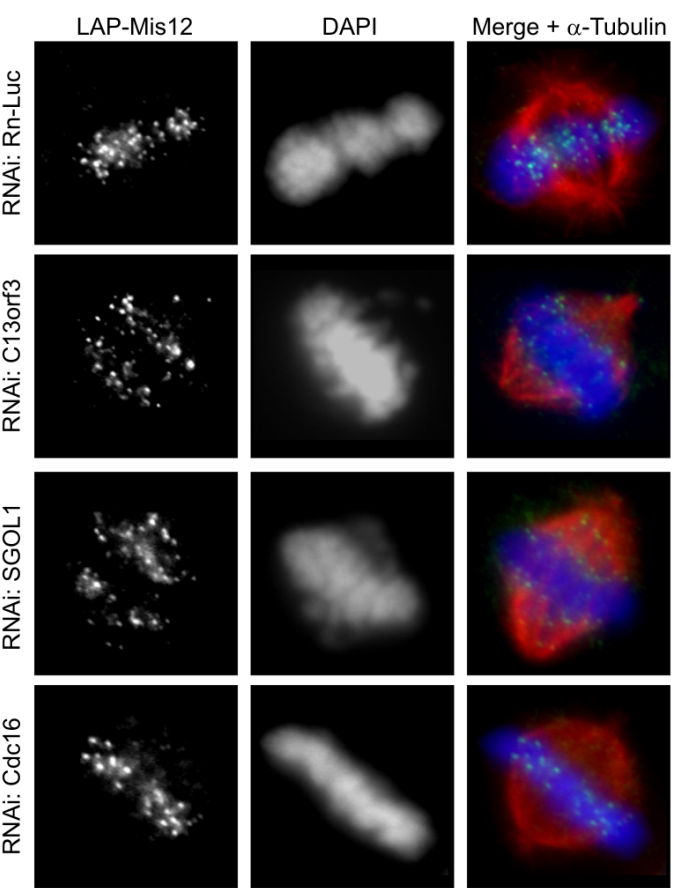

B

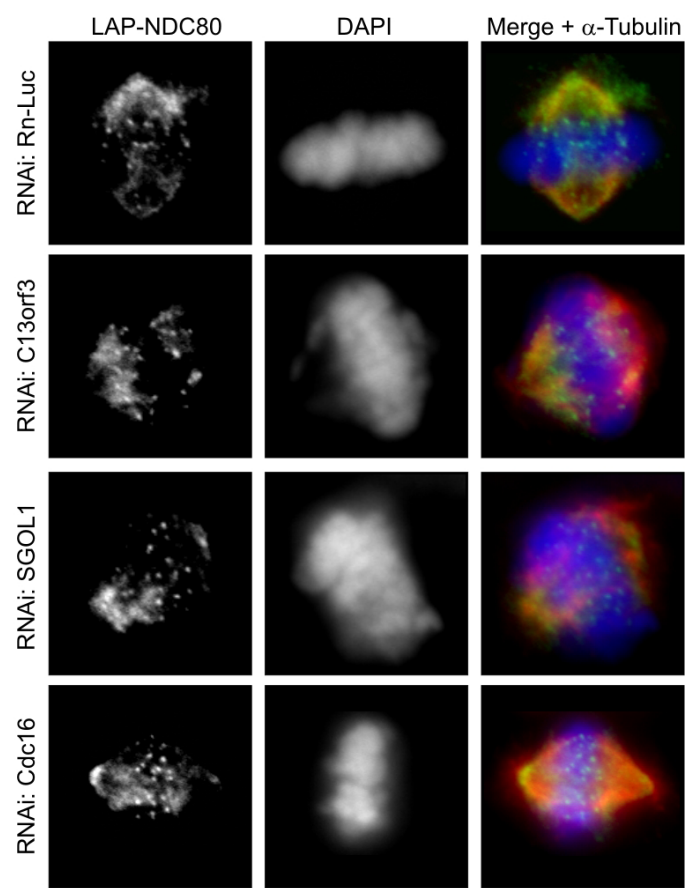

C

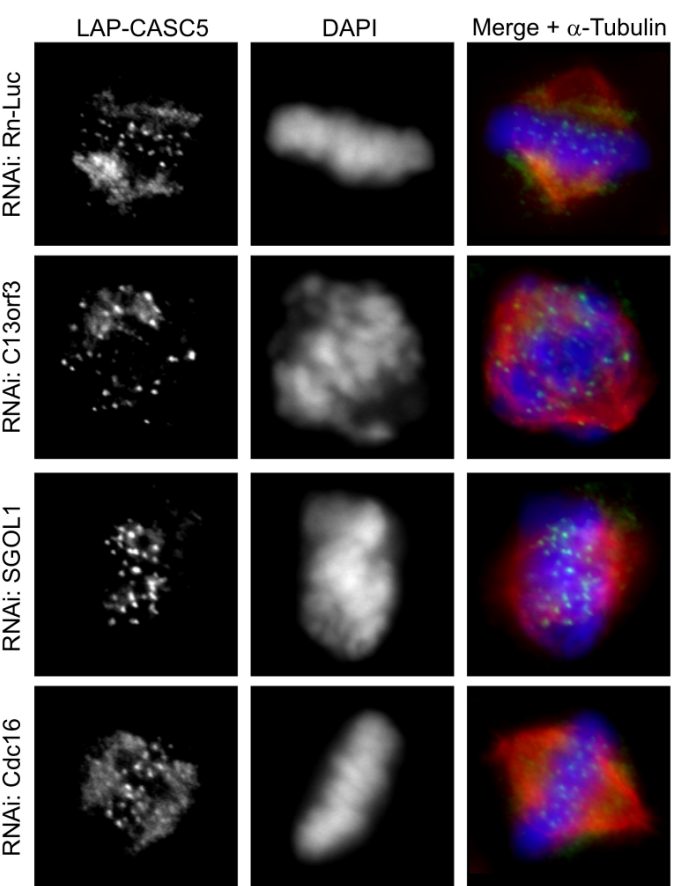

Figure S24

A

MS/MS Fragmentation of YIVSQVLPNPPQAVNNYKEEPVIVTPPTK

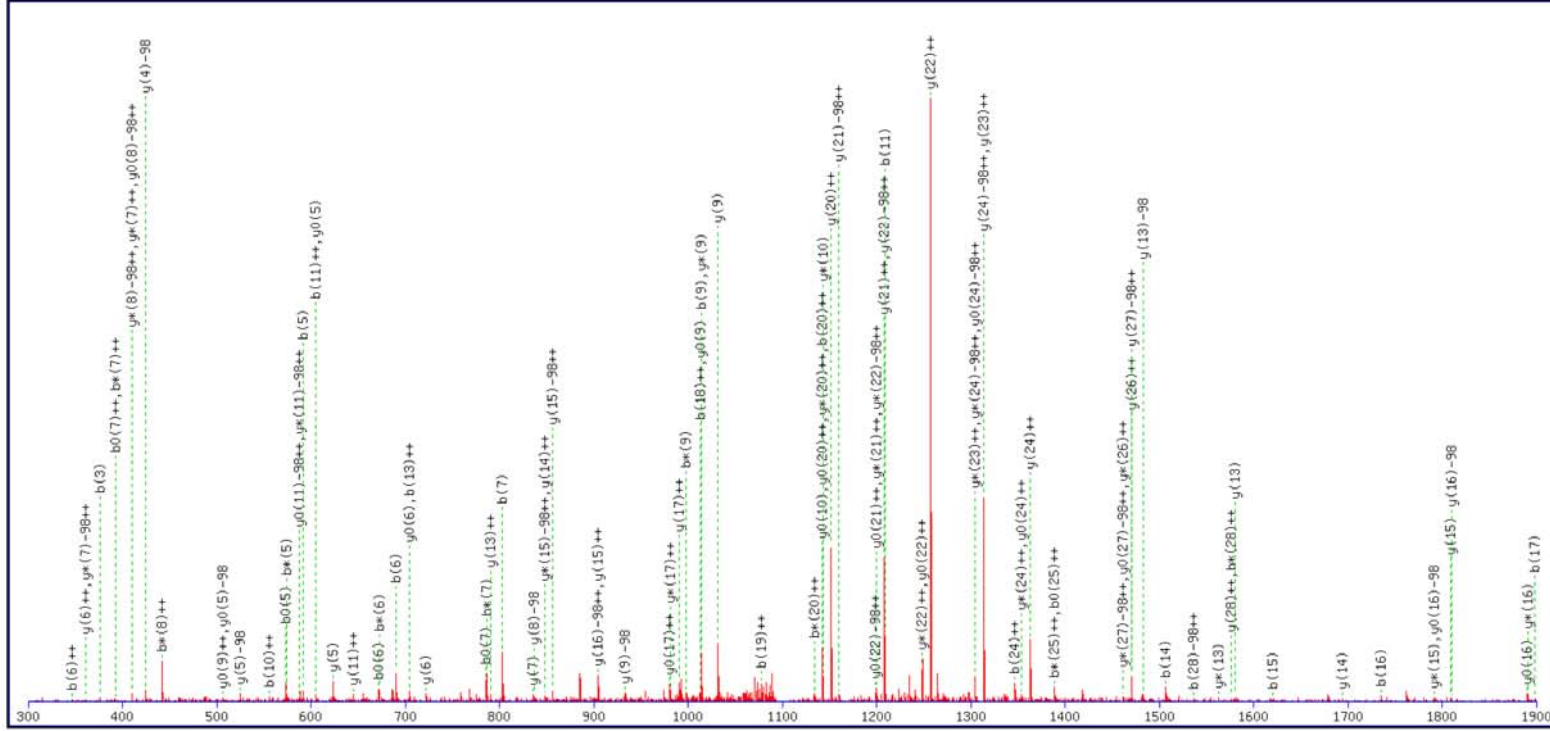

Monoisotopic mass of neutral peptide Mr(calc): 3313.6999  
Ions Score: 41 Expect: 0.0011

B

MS/MS Fragmentation of YIVSQVLPNPPQAVNNYKEEPVIVTPPTK

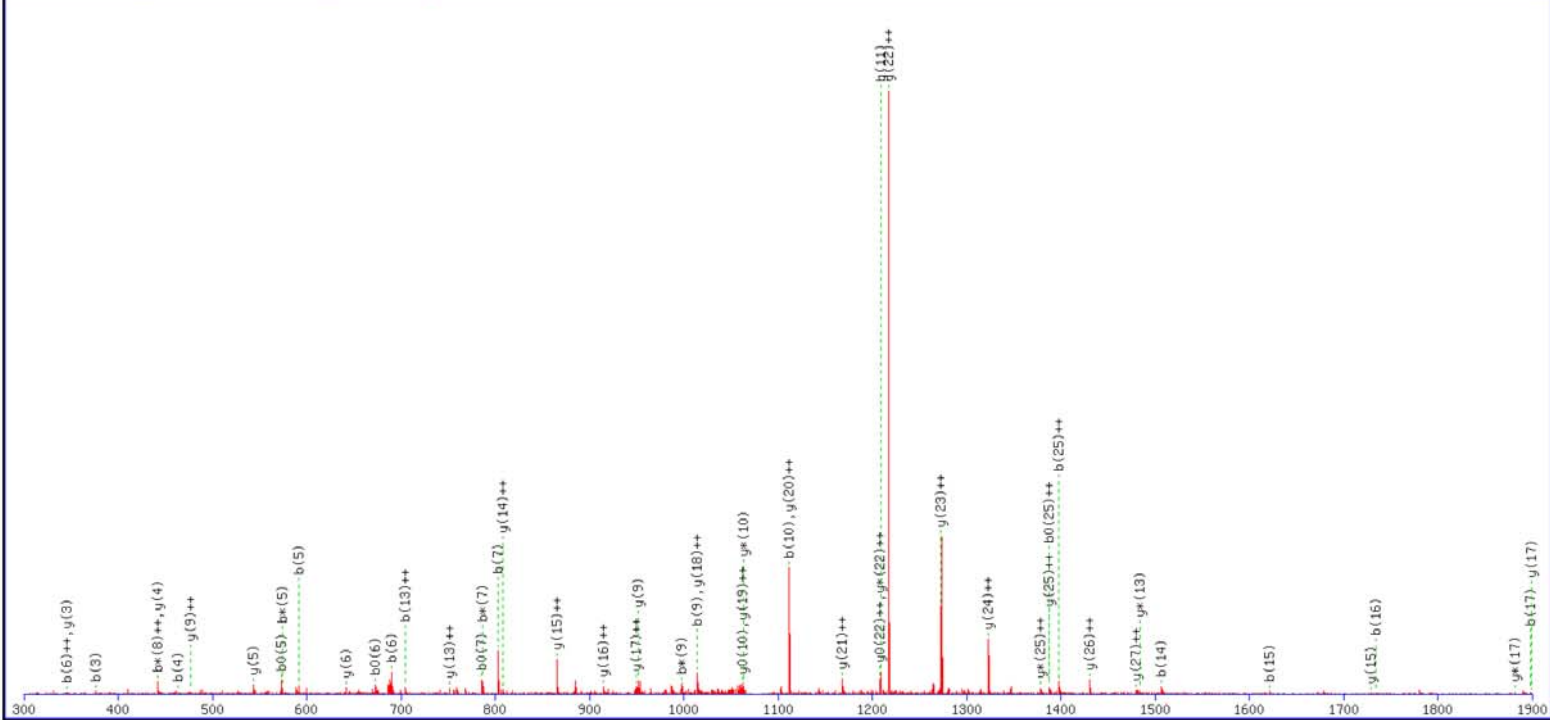

Monoisotopic mass of neutral peptide Mr(calc): 3233.7336  
Ions Score: 51 Expect: 4.2e-05

Figure S25

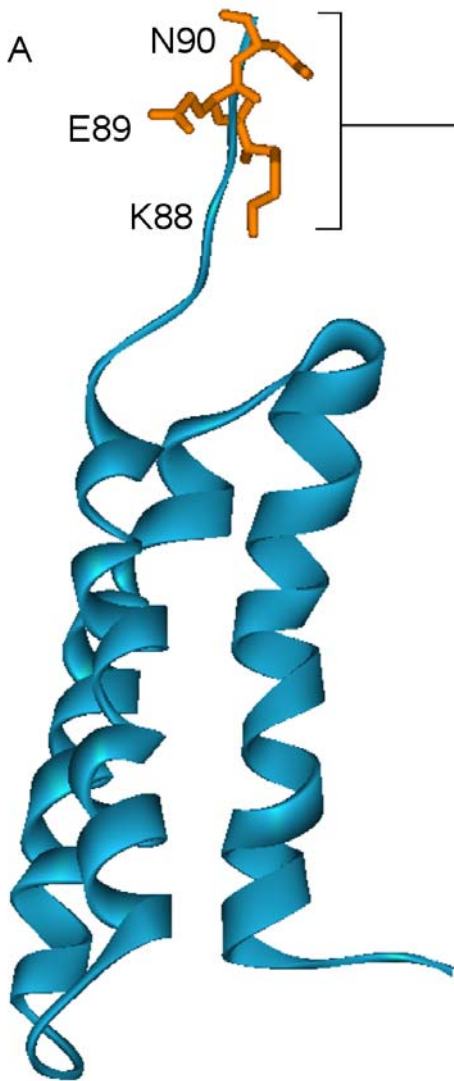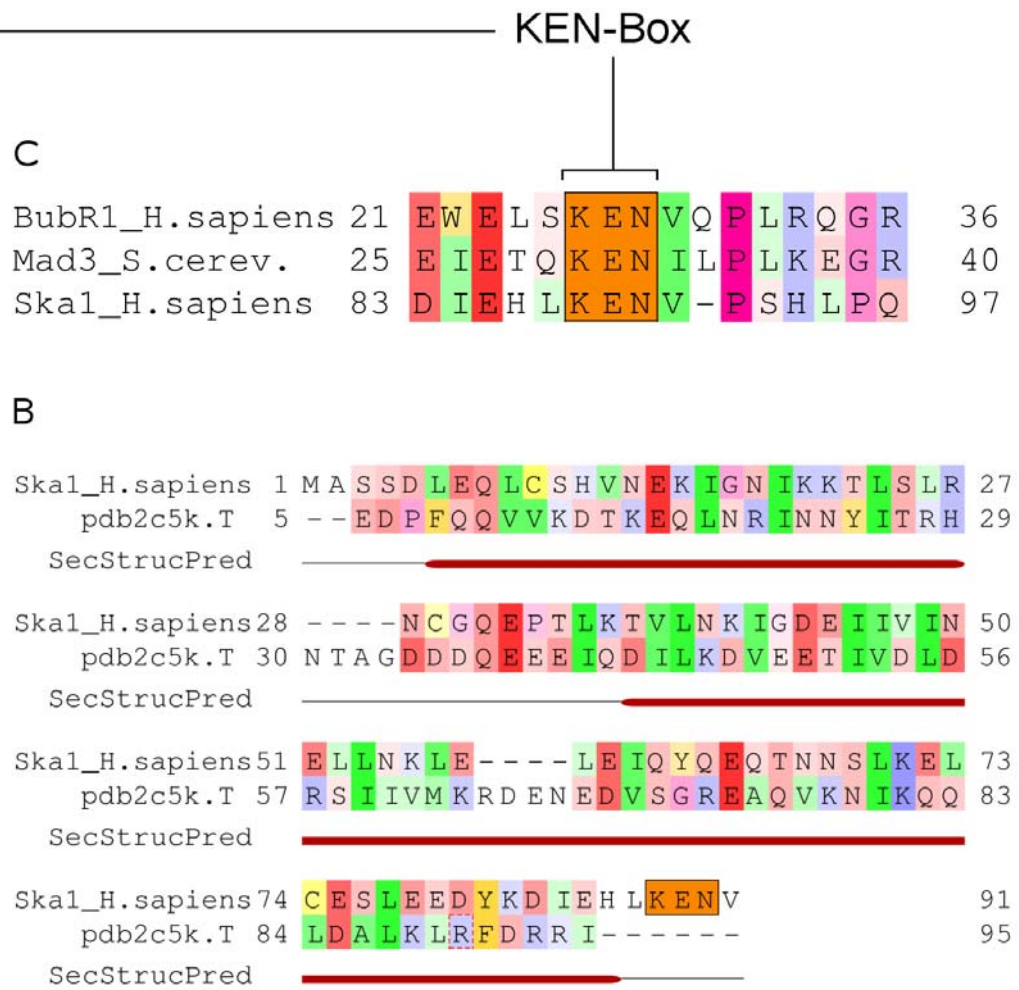



## Supplementary information S26

### Mass spectrometry

For assays performed using PPP2R2B as bait the cysteine bonds were reduced with 5 mM TCEP for 30 min at 37°C and alkylated with 10 mM Iodacetamide at room temperature. The peptides were purified using C18 microspin columns (Harvard Apparatus) according to the protocol of the manufacturer, resolved in 0,1 % formic acid, 1 % acetonitrile and injected into the mass spectrometer. The samples were analysed on an LTQ-FT-ICR mass spectrometer (Thermo-Fischer Scientific), which was connected online to a nanoelectrospray ion source (Thermo-Fischer Scientific). Peptide separation was carried out using an Eksigent Tempo nano LC 1D+ System (Eksigent Technologies) equipped with a RP-HPLC column (75 µm x 15 cm) packed in-house with C18 resin (Magic C18 AQ 3 µm; Michrom BioResources) using a linear gradient from 96 % solvent A (0,15 % formic acid, 2 % acetonitrile) and 4 % solvent B (98 % acetonitrile, 0,15 % formic acid) to 25 % solvent B over 60 minutes at a flow rate of 0,3 µl/min. 4 µl of each sample were injected per LC-MS/MS run and analyzed. The data acquisition mode was set to obtain one high resolution MS scan in the ICR cell at a resolution of 100,000 full width at half maximum (at  $m/z$  400) followed by MS/MS scans in the linear ion trap of the three most intense ions (overall cycle time of 1 second). To increase the efficiency of MS/MS attempts, the charged state screening modus was enabled to exclude unassigned and singly charges ions. Only MS precursors that exceeded a threshold of 150 ion counts were allowed to trigger MS/MS scans. The ion accumulation time was set to 500 ms (MS) and 250 ms (MS/MS) using a target setting of  $10^6$  (for MS) and  $10^4$  (for MS/MS) ions. After every sample, a peptide mixture containing 200 fmol of [Glu1]-Fibrinopeptide B human (Sigma) was analyzed by LC-MS/MS to constantly monitor the performance

of the LC-MS/MS system. Acquired MS2 scans were searched against the human International Protein Index (IPI) protein database (v.3.26) using the XTandem search algorithm (Craig & Beavis, 2004) with k-score plug-in (MacLean et al, 2006). In silico trypsin digestion was performed after lysine and arginine (unless followed by proline) in fully tryptic peptides. Allowed monoisotopic mass error for the precursor ions was 3 Daltons for the LTQ data and 50 ppm for the FT data. A fixed residue modification parameter was set for carboxyamidomethylation (+57.021464 Da) of cysteine residues. Oxidation of methionine (+15.994915 Da) was set as variable residue modification parameter. Model refinement parameters were set to allow phosphorylation (+79.966331 Da) of serine, threonine and tyrosine residues as variable modifications. Furthermore semi tryptic peptides were allowed for refinement searches. For scoring, a maximum of two missed cleavages were considered. Search results were evaluated on the Trans Proteomic Pipeline (TPP v3.2) using PeptideProphet (Keller et al, 2002) and ProteinProphet (Keller et al, 2005; Nesvizhskii et al, 2003).

For assays performed using Ska1, Ska2 or C13orf3 as baits the tryptic peptides were concentrated and desalted off-line using an UltraMicroSpin-C18 (The Nest Group) cartridge. Peptides were eluted by 150 µl of 80:20 acetonitrile/water with 0,1 TFA, the eluate was dried down and re-dissolved in 10 µl of 0,1 % TFA. The peptide mixtures was loaded to a 5mm×300m i.d. trapping micro-column packed with C18 PepMAP100 5 µm particles (Dionex) of Ultimate 3000 nanoLC system (Dionex) at a flow rate of 20 µl/min. Upon loading and washing, peptides were eluted onto a 15 cm×75 µm i.d. nano-column, packed with C18 PepMAP100 3 µm particles (Dionex). The nanoLC was interfaced on-line to a LTQ Orbitrap hybrid mass spectrometer (Thermo Fisher Scientific) via a robotic nanoflow ion source TriVersa (Advion BioSciences Ltd.) equipped with a LC coupler and a nanoESI chip with the diameter

of nozzles of 4,2  $\mu\text{m}$ . The TriVersa source was operated at the ionization voltage of 1,7 kV and was controlled by Chipsoft 6.4 software (Advion Biosciences). MS/MS was performed in data-dependent acquisition (DDA) mode under the control of Xcalibur 2.0 software (Thermo Fisher Scientific). The DDA cycle consisted of a survey scan acquired in one microscan within the range of  $m/z$  300-1600 performed under the target mass resolution of 60000 FWHM (full width at half-maximum) at Orbitrap analyzer under the target value of 1E06 ions. Survey scan was followed by MS/MS fragmentation of the four most abundant multiply charged precursors. Spectra were acquired in one microscan under the normalized collision energy of 35 % and target value of 1E04 ions in the linear ion trap (ion selection threshold 400 counts; precursor ions isolation width 4 amu). Activation parameter  $q = 0,25$  and activation time of 30 ms were applied. Previously fragmented precursors were dynamically excluded for 90 s. LC-MS/MS runs saved as .raw files were converted to .mgf (MASCOT generic format) files using extract\_msn utility from Bioworks 3.1 software (Thermo Fisher Scientific) and searched against an International Protein Index - Human database (68360 sequence entries; updated February, 2008) by MASCOT v. 2.1 software (Matrix Science Ltd.). Tolerances for precursor and fragment masses were set at 10 ppm and 0,6 Da, respectively; up to 1 missed cleavage was allowed; instrument profile was set to ESI-Trap; oxidation of methionine, acetylation of the N-terminal peptide and phosphorylation of serine, threonine and tyrosine were set as variable modification. MASCOT identifications were considered confident if hits were produced by matching of at least three MS/MS spectra each with peptide ions score above 20.

## Reference:

Craig R, Beavis RC (2004) TANDEM: matching proteins with tandem mass spectra. *Bioinformatics* **20**(9): 1466-1467

Keller A, Eng J, Zhang N, Li XJ, Aebersold R (2005) A uniform proteomics MS/MS analysis platform utilizing open XML file formats. *Mol Syst Biol* **1**: 2005 0017

Keller A, Nesvizhskii AI, Kolker E, Aebersold R (2002) Empirical statistical model to estimate the accuracy of peptide identifications made by MS/MS and database search. *Anal Chem* **74**(20): 5383-5392

MacLean B, Eng JK, Beavis RC, McIntosh M (2006) General framework for developing and evaluating database scoring algorithms using the TANDEM search engine. *Bioinformatics* **22**(22): 2830-2832

Nesvizhskii AI, Keller A, Kolker E, Aebersold R (2003) A statistical model for identifying proteins by tandem mass spectrometry. *Anal Chem* **75**(17): 4646-4658
